# Supplementary material for: Inventories of Short-Lived Fission Gas Nuclides in Nuclear Reactors
Source: MDPI journal article supplement (doi:10.3390/en16062530), 2023-03-07
Supplement: s1 [file s1]

Archive with 1 entries (1 files):
- energies-2213292-supplementary.pdf
